# Supplementary material for: A simple “palladium-free” synthesis of phenyleneethynylene-based molecular materials revisited
Source: Royal Society of Chemistry journal article supplement (doi:10.1039/b502950c), 2005-01-01
Supplement: b502950c.pdf [file b502950c.pdf]

# Supplementary Material (ESI) for New Journal of Chemistry

# This journal is © The Royal Society of Chemistry and

# The Centre National de la Recherche Scientifique, 2005

**A simple “palladium-free” synthesis of phenyleneethynylene-based molecular materials revisited.**

Donocadh P. Lydon, Laurent Porrès, Andrew Beeby, Todd B. Marder and Paul J. Low\*

Department of Chemistry, University of Durham, Durham, DH1 3LE, UK. Email

[p.j.low@durham.ac.uk](mailto:p.j.low@durham.ac.uk); Tel +44 (0)191 334 2114; Fax +44 (0)191 374 4737

**Experimental details and specific synthetic procedures**

*General conditions* Reactions involving lithium reagents were carried out under a dry nitrogen atmosphere using standard Schlenk techniques. Benzoquinone, naphthoquinone and anthraquinone, phenylacetylene (Aldrich), trimethylsilylacetylene (Fluorochem) and *n*-butyl lithium (1.6 M in hexanes, Acros) were purchased and, with the exception of naphthoquinone which was purified by chromatography on alumina (dichloromethane) prior to use, were used as received. Solvents were dried and deoxygenated using an Innovative Technologies Inc. Solvent Purification System. The compound 4-nonyloxyphenylacetylene was prepared by modification of the literature methods, as described below.<sup>S1</sup> IR spectra were recorded on an Nicolet Avatar spectrometer from nujol mulls supported between NaCl plates. NMR spectra were recorded from CDCl<sub>3</sub> solutions on a Bruker Avance 400 spectrometer, and referenced against solvent resonances. Mass spectra were recorded on Autospec EI and Micromass Quattro II spectrometers.

# Supplementary Material (ESI) for New Journal of Chemistry  
# This journal is © The Royal Society of Chemistry and  
# The Centre National de la Recherche Scientifique, 2005

**Preparation of 1,4-bis[(trimethylsilyl)ethynyl]-2,5-cyclohexadiene-1,4-diol (4a).**

To trimethylsilylacetylene (7.82 mL, 5.44 g, 54.4 mmol) in THF (50 mL) at  $-70\text{ }^{\circ}\text{C}$ , *n*-butyllithium (33 mL, 53 mmol) was added slowly while stirring, and the reaction was then allowed to warm to room temperature. The reaction was then cooled to  $-70\text{ }^{\circ}\text{C}$  and a solution of 1,4-benzoquinone (3.00 g, 27.7 mmol) in THF (50 mL) was added dropwise. The solution was then allowed to warm slowly room temperature and stirred overnight. The reaction was treated with a saturated solution of ammonium chloride and extracted with ethyl acetate. The organic solvents were removed under reduced pressure and the product was isolated following column chromatography on silica gel with a  $\text{CH}_2\text{Cl}_2/\text{EtOAc}$  gradient (Yield 7.65 g, 25.1 mmol, 95%).  $^1\text{H}$  NMR:  $\delta$  6.02 (s, 4H,  $\text{C}_6\text{H}_4$ ); 2.34 (s, 2H, OH); 0.15 (s, 18H,  $\text{CH}_3$ ).  $^{13}\text{C}$  NMR:  $\delta$  129.7(CH) 104.5/90.1  $-\text{C}\equiv\text{C}-$ , 61.2 (C(OH)), -0.29  $\text{Si}(\text{CH}_3)_3$  IR:  $\nu(\text{OH})$  3314;  $\nu(\text{C}\equiv\text{C})$  2184  $\text{cm}^{-1}$ . MS (EI):  $m/z$  (%) 304 (38)[ $\text{M}$ ] $^+$ ; 286 (3) [ $\text{M}-\text{H}_2\text{O}$ ] $^+$ ; 255 (100) [ $\text{M}-\text{CH}_3-2\text{H}_2\text{O}$ ] $^+$ .

**Preparation of 1,4-bis[(trimethylsilyl)ethynyl]benzene (4b).**

Compound **4a** (7.58 g, 24.9 mmol) was dissolved in absolute EtOH (30 mL) and added dropwise to a solution of  $\text{SnCl}_2\cdot 2\text{H}_2\text{O}$  (11.23 g, 49.8 mmol) in 50% acetic acid (30 mL) at  $60\text{ }^{\circ}\text{C}$  (10 min) and the precipitate formed collected by filtration and washed with water and dried to afford **4b** (3.81 g, 14.1 mol, 57%).  $^1\text{H}$  NMR:  $\delta$  = 7.39 (s 4H,  $\text{C}_6\text{H}_4$ ); 0.26 (s, 18H  $\text{CH}_3$ ).  $^{13}\text{C}$  NMR:  $\delta$  132.1, 123.5 (Ar); 104.9, 96.7, ( $-\text{C}\equiv\text{C}-$ ); 0.3  $\text{Si}(\text{CH}_3)_3$ . MS (EI):  $m/z$  (%) 270 (51)[ $\text{M}$ ] $^+$ ; 255 (100) [ $\text{M}-\text{CH}_3$ ] $^+$ .

# Supplementary Material (ESI) for New Journal of Chemistry  
# This journal is © The Royal Society of Chemistry and  
# The Centre National de la Recherche Scientifique, 2005

**Preparation of 1,4-dihydro-1,4-bis[(trimethylsilyl)ethynyl]-1,4-naphthalenediol (5a).**

Trimethylsilylacetylene (6.8 mL, 4.70 g,  $4.78 \times 10^{-2}$  mol) in THF (50 mL) was treated with *n*-butyllithium (30 mL, 48 mmol) at  $-70$  °C and allowed to warm to room temperature. The reaction mixture was cooled to  $-70$  °C, 1,4-naphthoquinone (3.60 g, 22.8 mmol) in THF (50 mL) was added dropwise, and the reaction was allowed to warm to room temperature and stirred overnight. The reaction was then quenched at  $0$  °C with aqueous ammonium chloride, extracted with EtOAc and washed with concentrated brine. The organic phase was evaporated to dryness under reduced pressure. The crude product was purified by column chromatography on silica gel and eluted with a  $\text{CH}_2\text{Cl}_2/\text{EtOAc}$  gradient (Yield 7.62 g, 21.5 mmol, 90%).  $^1\text{H}$  NMR:  $\delta$  7.83 [dd,  $^3J(\text{H,H}) = 5.9$  Hz,  $^4J(\text{H,H}) = 3.2$  Hz, 2H, ArH]; 7.43 [dd,  $^3J(\text{H,H}) = 5.9$  Hz,  $^4J(\text{H,H}) = 3.2$  Hz, 2H, ArH]; 6.19 (s, 2H,  $\text{H}_4\text{C}_{10}\text{H}_2(\text{OH})_2$ ); 2.49 (s, 2H, C-OH); 0.16 (s, 18H,  $\text{Si}(\text{CH}_3)_3$ ).  $^{13}\text{C}$  NMR:  $\delta$  136.7, 130.5, 129.5, 128.2 (Ar); 106.9, 90.5 ( $-\text{C}\equiv\text{C}-$ ); 64.4 ( $\text{C}(\text{OH})_2$ ); 0.1 ( $\text{Si}(\text{CH}_3)_3$ ). IR:  $\nu$  (OH) 3513, 3428;  $\nu$  ( $\text{C}\equiv\text{C}$ )  $2164\text{ cm}^{-1}$ . MS (EI):  $m/z$  (%) 354 (7.45)  $[\text{M}]^+$ ; 337 (7.00)  $[\text{M}-(\text{OH})]^+$ ; 321, (8.38)  $[\text{M}-2(\text{HO})]^+$ ; 305, (10.65)  $[\text{M}-\text{H}_2\text{O}-\text{OH}-\text{CH}_3]^+$ .

**Preparation of 1,4-bis[(trimethylsilyl)ethynyl]naphthalene (5b).**

Compound **5a** (1.40 g, 3.95 mmol) was dissolved in EtOH (20 mL) and treated with excess  $\text{SnCl}_2 \cdot 2\text{H}_2\text{O}$  (1.78 g, 7.9 mmol) in 50% acetic acid (20 mL) at  $60$  °C. The crude product precipitated from solution, was collected by filtration, washed with water and methanol, and purified by chromatography on silica gel using hexane as eluent (Yield 0.87 g, 2.71 mmol, 69%).  $^1\text{H}$  NMR:  $\delta$  8.37 [dd,  $^3J(\text{H,H}) = 6.7\text{ Hz}$ ,  $^4J(\text{H,H}) = 3.2$  Hz, 2H, ArH]; 7.65 (s, 2H, CH); 7.63 [dd,  $^3J(\text{H,H}) = 6.7$  Hz,  $^4J(\text{H,H}) = 3.2$  Hz, 2H, ArH]; 0.35 (s,

# Supplementary Material (ESI) for New Journal of Chemistry

# This journal is © The Royal Society of Chemistry and

# The Centre National de la Recherche Scientifique, 2005

18H, Si(CH<sub>3</sub>)<sub>3</sub>. <sup>13</sup>C NMR: δ 133.5, 130.3, 127.6, 126.9, 121.9 (Ar); 103.2, 101.7

(-C≡C-); 0.4 (Si(CH<sub>3</sub>)<sub>3</sub>). MS (EI): *m/z* (%) 320 (100) [M]<sup>+</sup>; 305 (94) [M-(CH<sub>3</sub>)]<sup>+</sup>. Anal.

Calcd (%) for C<sub>20</sub>H<sub>24</sub>Si<sub>2</sub> (320.58) C 74.93, H 7.55; found C 74.90, H 7.61.

### Preparation of 9,10-dihydro-9,10-bis[(trimethylsilyl)ethynyl]-9,10-anthracenediol

#### (6a).

Trimethylsilylacetylene (6.0 mL, 4.16 g, 42.4 mmol) in THF (50 mL) was treated with *n*-butyllithium (26 mL, 41.6 mmol) at -70 °C and allowed to warm to 0 °C. The reaction mixture was cooled to -70 °C and 9,10-anthraquinone (4.00 g, 19.2 mmol) in THF (50 mL) was added dropwise, and the reaction was allowed to warm to room temperature before being allowed to stir overnight. The reaction mixture was then quenched with aqueous ammonium chloride, extracted into EtOAc, and washed twice with brine. The crude product was then obtained by removal of the solvent, and used in the reduction without further purification (Yield 7.6 g, 18.8 mmol, 98 %). <sup>1</sup>H NMR: δ = 8.05 [dd, <sup>3</sup>*J*(H,H) = 5.8 Hz, <sup>4</sup>*J*(H,H) = 3.2 Hz, 4H, ArH]; 7.45 [dd, <sup>3</sup>*J*(H,H) = 5.8 Hz, <sup>4</sup>*J*(H,H) = 3.2 Hz, 4H, ArH]; 3.31 (m, 2H, C(OH)<sub>2</sub>); 0.17 (s, 18H, CH<sub>3</sub>). <sup>13</sup>C NMR: δ = 138.3, 129.3, 126.8 (Ar); 107.7, 92.6 (-C≡C-); 68.7 (C-OH); -0.06 (Si(CH<sub>3</sub>)<sub>3</sub>). IR: ν(OH) 3506, 3410; ν(C≡C) 2171, 2157 cm<sup>-1</sup>. MS (EI): *m/z* (%) 404 (2) [M]<sup>+</sup>; 387 (36) [M-(OH)]<sup>+</sup>; 370 (22) [M-2(OH)]<sup>+</sup>.

#### Preparation of 9,10-bis[(trimethylsilyl)ethynyl]anthracene (6b).

Compound **6a** (5.0 g, 12.3 mmol) was dissolved in EtOH (20 mL) and treated with SnCl<sub>2</sub>·2H<sub>2</sub>O (13.34 g, 59.1 mmol) in 50% acetic acid (20 mL) at 60° C. The precipitate

# Supplementary Material (ESI) for New Journal of Chemistry

# This journal is © The Royal Society of Chemistry and

# The Centre National de la Recherche Scientifique, 2005

formed was collected by filtration and washed with water and methanol before being recrystallised from toluene (Yield 1.80 g, 4.83 mmol, 39%).  $^1\text{H}$  NMR:  $\delta$  = 8.58 [dd,  $^3J(\text{H,H})$  = 6.8 Hz,  $^4J(\text{H,H})$  = 3.4 Hz, 4H, ArH]; 7.60 [dd,  $^3J(\text{H,H})$  = 6.8 Hz,  $^4J(\text{H,H})$  = 3.6 Hz, 4H, ArH]; 0.43 (s, 18H,  $\text{CH}_3$ ).  $^{13}\text{C}$  NMR:  $\delta$  = 132.6, 127.6, 127.2, 118.8 (Ar); 108.5, 101.9 ( $-\text{C}\equiv\text{C}-$ ); 0.56 ( $\text{Si}(\text{CH}_3)_3$ ). MS (EI):  $m/z$  (%) = 370 (100)  $[\text{M}]^+$ ; 355 (40)  $[\text{M}-(\text{CH}_3)]^+$ . Anal. Calcd. (%) for  $\text{C}_{24}\text{H}_{26}\text{Si}_2$ : C 77.77, H 7.07; found: C 77.65.19, H.7.10.

#### **Preparation of 1,4-bis(phenylethynyl)-2,5-cyclohexadiene-1,4-diol (7a).**

Phenylacetylene (5.56 g, 54.4 mmol) in THF (50 mL) was treated with *n*-butyllithium (33 mL 52.8 mmol) at  $-70$  °C and the reaction mixture was allowed to warm to room temperature. This solution was cooled ( $-70$  °C) and a solution of benzoquinone (3.00 g, 27.7 mmol) in THF (50 mL) was added dropwise as the solution was allowed to warm to room temperature overnight. The reaction was quenched with aqueous ammonium chloride and extracted into EtOAc and washed with water (50 mL  $\times$  2) and brine (20 mL). The crude product was purified by column chromatography (silica gel,  $\text{CH}_2\text{Cl}_2/\text{EtOAc}$  gradient) (Yield: 6.1 g, 19.5 mmol, 74%).  $^1\text{H}$  NMR:  $\delta$  7.39 (m, 4H, ArH); 7.24 (m, 6H, ArH); 6.13/6.07 (s, 4H,  $\text{C}_6(\text{OH})_2\text{H}_2$ ); 6.07 (s, 2H,  $\text{C}(\text{OH})_2\text{H}_2$ ); 3.58 (s, 2H,  $\text{C}_6\text{H}_4(\text{OH})_2$ ).  $^{13}\text{C}$  NMR:  $\delta$  132.2, 132.2, 130.2, 129.7, 129.2, 129.1, 128.6, 128.5 (Ar); 88.9, 85.5 ( $-\text{C}\equiv\text{C}-$ ); 70.8/61.8 (C OH). IR:  $\nu(\text{OH})$  3266;  $\nu(\text{C}\equiv\text{C})$  2217  $\text{cm}^{-1}$ . MS (EI):  $m/z$  (%) 312 (20)  $[\text{M}]^+$ ; 294 (66)  $[\text{M}-(\text{H}_2\text{O})]^+$ ; 278 (57)  $[\text{M}-2(\text{OH})_2]^+$ .

# Supplementary Material (ESI) for New Journal of Chemistry  
# This journal is © The Royal Society of Chemistry and  
# The Centre National de la Recherche Scientifique, 2005

**Preparation of 1,4-bis(phenylethynyl)benzene (7b).**

Compound **7a** (6.1 g, 19.5 mmol) was dissolved in ethanol (20 mL) and treated with  $\text{SnCl}_2 \cdot 2\text{H}_2\text{O}$  (8.78 g, 39.0 mmol) in 50% acetic acid (20 mL) at 60 °C, giving a precipitate, which was collected by filtration, washed with water and methanol and dried (Yield 3.4 g, 12.2 mmol, 63%).  $^1\text{H}$  NMR:  $\delta$  7.55 (m, 4H, ArH); 7.52 (m, 4H, ArH); 7.36 (m, 6H, ArH).  $^{13}\text{C}$ -NMR:  $\delta$  132.0, 131.9, 128.8, 128.8, 123.5, 123.4 (Ar); 91.6, 89.5 (-C $\equiv$ C-). MS (EI):  $m/z$  (%) 278 (100) [ $\text{M}$ ] $^+$ . Anal. Calcd. (%) for  $\text{C}_{22}\text{H}_{14}$  C 94.93, H 5.07; found: C 95.01, H 5.04.

**Preparation of 1,4-dihydro-1,4-bis(phenylethynyl)-1,4-naphthalenediol (8a).**

Phenylacetylene (4.91 g, 48.1 mmol) in THF (50 mL) was treated with *n*-butyllithium (28 mL, 44.8 mmol) at -70 °C. The reaction was allowed to warm to 0 °C and was cooled again to -70 °C and a solution of 1,4-naphthoquinone (3.69 g, 23.3 mmol) in THF (50 mL) was added. The reaction was then allowed to warm to room temperature while stirring overnight. The reaction was quenched with aqueous ammonium chloride and extracted into EtOAc and washed with water (2  $\times$  50 mL) and brine (20 mL) at 0 °C. The crude product was purified by passing through a short column of silica gel, eluting with  $\text{CH}_2\text{Cl}_2/\text{EtOAc}$  gradient (Yield 5.67 g, 15.6 mmol, 67%).  $^1\text{H}$  NMR:  $\delta$  7.98 [dd,  $^3J(\text{H},\text{H}) = 6.2$  Hz,  $^4J(\text{H},\text{H}) = 3.6$  Hz, 2H, ArH]; 7.45 (m, 6H, ArH); 7.32 (m, 6H, ArH); 6.33 (s, 2H,  $\text{C}_6(\text{OH})_2\text{H}_2$ ); 3.05 (s, 2H, C-(OH));  $^{13}\text{C}$ -NMR:  $\delta$  136.8, 132.1, 130.3, 129.5, 128.9, 128.5, 128.3, 122.4 (Ar); 91.1, 85.6 (-C $\equiv$ C-); 64.5 (C-OH). IR:  $\nu(\text{OH})$  3250;  $\nu(\text{C}\equiv\text{C})$  2224  $\text{cm}^{-1}$ . MS (EI):  $m/z$  (%) 362 (1) [ $\text{M}$ ] $^+$ ; 344 [ $\text{M}-(\text{OH}_2)$ ] $^+$ ; 328 [ $\text{M}-(\text{OH})_2$ ] $^+$ .

# Supplementary Material (ESI) for New Journal of Chemistry  
# This journal is © The Royal Society of Chemistry and  
# The Centre National de la Recherche Scientifique, 2005

**Preparation of 1,4-bis(phenylethynyl)naphthalene (8b).**

Compound **8a** (4.5 g, 12.4 mmol) was dissolved in ethanol (20 mL) and treated with  $\text{SnCl}_2 \cdot 2\text{H}_2\text{O}$  (2.79 g, 12.4 mmol) in 50% acetic acid (20 mL) at 60 °C, giving a precipitate which was collected by filtration, washed with water and methanol and dried (Yield 3.1 g, 9.44 mmol, 76%).  $^1\text{H}$  NMR:  $\delta$  = 8.50 [dd,  $^3J(\text{H,H}) = 6.2$  Hz,  $^4J(\text{H,H}) = 3.6$  Hz, 2H, ArH]; 7.75 (s, 2H, ArH); 7.67 (m, 6H, ArH); 7.41 (m, 6H, ArH).  $^{13}\text{C}$ -NMR:  $\delta$  133.5, 132.1, 130.1, 128.9, 128.8, 127.6, 127.0, 123.6, 121.9 (Ar); 96.3, 87.9 ( $-\text{C}\equiv\text{C}-$ ). MS(EI):  $m/z$  (%) 328 (93)  $[\text{M}]^+$ . Anal. Calcd. (%) for  $\text{C}_{26}\text{H}_{16}$  C 95.09, H 4.91; found: C 95.01, H 4.96.

**Preparation of 9,10-dihydro-9,10-bis(phenylethynyl)-9,10-anthracenediol (9a).**

Phenylacetylene (4.69 g, 46.0 mmol) in THF (50 mL) was treated with *n*-butyllithium (27.5 mL, 44.0 mmol) at -70 °C. The reaction was then allowed to warm to room temperature, was cooled again to -70 °C, and a solution of 9,10-anthraquinone (4.60 g, 22.0 mmol) in THF (50 mL) was added and the mixture was allowed to warm to room temperature while stirring overnight. The reaction was cooled (0 °C), quenched with aqueous ammonium chloride, extracted into EtOAc and washed with water (2 × 50 mL) and brine (20 mL) before being dried over  $\text{MgSO}_4$ . After removal of the organic solvent under reduced pressure, the crude product was recrystallised from  $\text{CH}_2\text{Cl}_2$  and hexane (Yield: 4.3 g, 10.4 mmol, 47%).  $^1\text{H}$  NMR:  $\delta$  8.08 [dd,  $^3J(\text{H,H}) = 5.9$  Hz,  $^4J(\text{H,H}) = 3.2$  Hz, 4H, ArH]; 7.41 [dd,  $^3J(\text{H,H}) = 5.9$  Hz,  $^4J(\text{H,H}) = 3.2$  Hz, 4H, ArH]; 7.35 (m, 4H, ArH); 7.22 (m, 6H, (ArH), 3.10 (s, 2H,  $\text{C}(\text{OH})_2$ ).  $^{13}\text{C}$  NMR:  $\delta$  138.2, 132.1, 129.6, 129.1, 128.6, 127.4, 122.4 (Ar); 91.8, 87.3 ( $-\text{C}\equiv\text{C}-$ ); 68.7 (C-OH). IR:  $\nu(\text{OH})$  3271;  $\nu(\text{C}\equiv\text{C})$

# Supplementary Material (ESI) for New Journal of Chemistry

# This journal is © The Royal Society of Chemistry and

# The Centre National de la Recherche Scientifique, 2005

2254 cm<sup>-1</sup>. MS (EI): *m/z* (%) 412 (2) [M]<sup>+</sup>; 394 (24) [M-(H<sub>2</sub>O)]<sup>+</sup>; 378 (37) [M-(OH)<sub>2</sub>]<sup>+</sup>;

294 (100) [M-C<sub>6</sub>H<sub>5</sub>C<sub>2</sub>(OH)]<sup>+</sup>.

### Preparation of 9,10-bis(phenylethynyl)anthracene (9b).

Compound **9a** (3.5 g, 8.49 mmol) was dissolved in EtOH (20 mL) and treated with SnCl<sub>2</sub>·2H<sub>2</sub>O (3.86 g, 17.1 mmol) in 50% acetic acid at 60 °C. The precipitate formed was collected by filtration, washed with water and methanol and recrystallised from toluene to afford **9b** (Yield 2.1 g, 5.55 mmol, 65%). <sup>1</sup>H NMR: δ 8.70 [dd, <sup>3</sup>*J*(H,H) = 6.7 Hz, <sup>4</sup>*J*(H,H) = 3.4 Hz, 4H, ArH]; 7.80 (m, 4H, ArH); 7.65 [dd, <sup>3</sup>*J*(H,H) = 6.7 Hz, <sup>4</sup>*J*(H,H) = 3.4 Hz, 4H, ArH]; 7.45 (m, 6H, ArH). <sup>13</sup>C NMR: δ 132.5, 132.1, 129.1, 128.9, 127.6, 127.2, 123.8, 118.9 (Ar); 102.8, 86.9 (-C≡C-). MS (EI): *m/z* (%) 378 (2) [M]<sup>+</sup>; 394 (24) [M-(H<sub>2</sub>O)]<sup>+</sup>; 378 (37) [M-(OH)<sub>2</sub>]<sup>+</sup>; 294 (100) [M-C<sub>6</sub>H<sub>5</sub>C<sub>2</sub>(OH)]<sup>+</sup>. Anal. Calcd. (%) for C<sub>30</sub>H<sub>18</sub> C 95.21, H 4.79 found: C 95.42, H 4.75.

### Preparation of 1-(phenylethynyl)-4-[(trimethylsilyl)ethynyl]-2,5-cyclohexadiene-1,4-diol (10a).

A solution of phenylacetylene (3.00 g, 29.4 mmol) in THF (50 mL) was treated with *n*-butyllithium (17 mL, 27.2 mmol) at -70 °C and allowed to warm to room temperature. The reaction mixture was cooled to -70 °C and 1,4-benzoquinone (3.00 g, 27.7 mmol) in THF (50 mL) was added dropwise and the reaction allowed to warm to 0 °C with stirring. The reaction mixture was then cooled once more to -70 °C whereupon lithium trimethylsilylacetylide (27.2 mmol) in THF (50 mL) was added and the reaction mixture was allowed to stir, while warming slowly to room temperature overnight. The reaction



# Supplementary Material (ESI) for New Journal of Chemistry

# This journal is © The Royal Society of Chemistry and

# The Centre National de la Recherche Scientifique, 2005

was quenched with aqueous ammonium chloride at 0° C and extracted into EtOAc, washed twice with brine. The crude product was purified by passage through a short column of silica, eluting with a CH<sub>2</sub>Cl<sub>2</sub>/EtOAc gradient (Yield 6.9 g, 22.4 mmol 82%).  
<sup>1</sup>H NMR: δ 7.43 (m, 2H, ArH); 7.30 (m, 3H, ArH); 6.10 (m, 4H, C-(OH)<sub>2</sub>); 2.35, 2.27 (s, 2H, C-(OH)); 0.14 (s, 9H, Si(CH<sub>3</sub>)<sub>3</sub>). <sup>13</sup>C-NMR: δ 132.2, 130.2, 130.1, 129.2, 128.6, 128.7, 128.6, 122.3 (Ar); 104.9, 90.6, 88.9, 85.5 (-C≡C-); 61.74, 61.57 (C(OH)); 0.1 (Si(CH<sub>3</sub>)<sub>3</sub>). IR: ν(OH) 3314; ν(C≡C) 2219, 2162 cm<sup>-1</sup>, MS (EI): m/z (%) 308 (10) [M]<sup>+</sup>; 290 (4) [M-(H<sub>2</sub>O)]<sup>+</sup>; 275 (13) [M-(OH)<sub>2</sub>]<sup>+</sup>; 294 (100) [M-C<sub>6</sub>H<sub>5</sub>C<sub>2</sub>(OH)]<sup>+</sup>.

#### **Preparation of 1-(phenylethynyl)-4-[(trimethylsilyl)ethynyl]benzene (10b).**

Compound **10a** (6.20 g, 20.1 mmol) was dissolved in EtOH (20 mL) and treated with SnCl<sub>2</sub>·2H<sub>2</sub>O (5.52 g, 24.5 mmol) in 50% acetic acid (20 mL) at 60 °C. The precipitate formed was collected by filtration, washed with water and methanol and the product was recrystallised from toluene (Yield 4.1 g, 14.9 mmol, 74%). <sup>1</sup>H NMR: δ 7.54 (m, 3H, ArH); 7.45 (m, 3H, ArH); 7.35 (m, 3H, ArH); 0.27 (s, 9H, Si(CH<sub>3</sub>)<sub>3</sub>). <sup>13</sup>C NMR: δ 132.3, 131.9, 131.8, 128.8, 128.7, 123.7, 123.4, 123.3 (Ar); 105.0, 96.6, 91.7, 89.3 (-C≡C-); 0.28 (Si(CH<sub>3</sub>)<sub>3</sub>). MS (EI): m/z (%) 274 (61) [M]<sup>+</sup>; 259 (91) [M-CH<sub>3</sub>]<sup>+</sup>. Anal. Calcd. (%) for C<sub>19</sub>H<sub>18</sub>Si C 83.15, H 6.61; found: C 83.14, H 6.48.

#### **Preparation of 1-([4-nonyloxyphenyl]ethynyl)-4-(phenylethynyl)-2,5-cyclohexadiene-1,4-diol (11a).**

Phenylacetylene (0.90 mL, 0.834 g, 8.17 mmol) in THF (50 mL) at -78 °C was treated with *n*-butyllithium (5.1 mL, 8.16 mmol) and allowed to warm slowly to 0 °C. The

# Supplementary Material (ESI) for New Journal of Chemistry

# This journal is © The Royal Society of Chemistry and

# The Centre National de la Recherche Scientifique, 2005

lithium phenylacetylide suspension was then cooled again to  $-78\text{ }^{\circ}\text{C}$  and a solution of 1,4-benzoquinone (0.88 g, 8.14 mmol) in THF (50 mL) was added dropwise forming a deep blue colour. The reaction was allowed to stir for 1h at  $-78\text{ }^{\circ}\text{C}$  and then warmed to  $0\text{ }^{\circ}\text{C}$  to ensure complete reaction and then re-cooled to  $-78\text{ }^{\circ}\text{C}$ . In a separate flask, a solution of 4-(nonyloxy)phenylethyne (2.00 g, 8.18 mmol) in THF (40 mL) at  $-78\text{ }^{\circ}\text{C}$  was treated with *n*-butyllithium (5.1 mL,  $8.16 \times 10^{-3}$  mol) and allowed to stir for 1h while warming to  $0\text{ }^{\circ}\text{C}$ . This solution was added to the cold solution contained in the first flask, and allowed to warm to  $0\text{ }^{\circ}\text{C}$  before being quenched with aqueous ammonium chloride. The reaction mixture was then extracted with EtOAc and the solvent removed from the extracts to give the crude product which was purified by column chromatography using  $\text{CH}_2\text{Cl}_2$  as the eluent (Yield 1.30 g, 2.86 mmol, 35%).  $^1\text{H}$  NMR:  $\delta$  7.42 (m, 2H, ArH); 7.34 (m, 2H, ArH); 7.28 (m, 2H, ArH); 6.78 (m, 2H, ArH); 6.11 (m, 4H,  $\text{C}_6\text{H}_4(\text{OH})_2$ ); 3.91 [t,  $^3J(\text{H,H}) = 6.8$  Hz, 2H,  $\text{OCH}_2\text{R}$ ]; 3.55 (s, br 2H,  $\text{C}_6\text{H}_4(\text{OH})_2$ ); 1.75, 1.47, 1.22 (m, 14H, aliphatic); 0.89 (t,  $^3J(\text{H,H}) = 6.8$  Hz, 3H  $\text{CH}_3$ ).  $^{13}\text{C}$ -NMR:  $\delta$  159.9, 133.7, 133.3, 132.8, 132.2, 132.1, 129.5, 129.0, 128.6, 122.5, 114.8 (Ar); 89.1, 87.6, 85.8, 85.5 ( $-\text{C}\equiv\text{C}-$ ); 68.4 (OCH); 61.7, (C-OH); 31.9, 29.5, 26.4, 26.0, 22.9, 18.7 (aliphatic); 14.4 ( $\text{CH}_3$ ) IR:  $\nu$  (OH) 3309;  $\nu$  ( $\text{C}\equiv\text{C}$ ) 2223  $\text{cm}^{-1}$ . MS (EI):  $m/z$  (%) 454 (2)  $[\text{M}]^+$ ; 436 (72)  $[\text{M}-(\text{H}_2\text{O})]^+$ ; 420 (33)  $[\text{M}-2(\text{OH})]^+$ .

### Preparation of 1-[(4-nonyloxyphenyl)ethynyl]-4-(phenylethynyl)benzene (11b)

Compound **11a** (1.30 g, 2.86 mmol) in EtOH (10 mL) was added to  $\text{SnCl}_2 \cdot 2\text{H}_2\text{O}$  (0.77 g, 3.4 mmol) in 50 % aqueous acetic acid (10 mL) and heated to  $60\text{ }^{\circ}\text{C}$ . The crude product which precipitated was collected by filtration and allowed to dry in air. The product was

# Supplementary Material (ESI) for New Journal of Chemistry

# This journal is © The Royal Society of Chemistry and

# The Centre National de la Recherche Scientifique, 2005

purified by column chromatography on silica gel, eluting with hexane (Yield 0.40 g, 0.95

mmol, 33 %).  $^1\text{H}$  NMR:  $\delta$  7.55 (m, 8H, ArH); 7.35 (m, 3H, ArH); 6.87 (m, 2H, ArH);

3.97 [t,  $^3J(\text{H,H}) = 6.8$  Hz, 2H,  $\text{OCH}_2\text{R}$ ]; 1.77, 1.48 (m, 14H,  $-\text{CH}_2\text{-aliphatic}$ ); 0.89 [t,

$^3J(\text{H,H}) = 6.8\text{Hz}$ , 3H, aliphatic].  $^{13}\text{C}$  NMR:  $\delta$  159.8, 133.5, 131.98, 131.9, 131.7, 128.7,

123.9, 123.5, 123.0, 115.2, 114.9 (Ar); 91.9, 91.4, 89.6, 88.2 ( $-\text{C}\equiv\text{C}-$ ); 68.5 ( $\text{OCH}_2\text{-}$

aliphatic); 31.9, 29.5, 26.1, 22.95, (aliphatic), 14.4 ( $\text{CH}_3$ ). MS (EI):  $m/z$  (%) 420 (97)

$[\text{M}]^+$ ; 294 (100)  $[\text{M}-(\text{C}_6\text{H}_{12})]^+$ . Anal. Calcd. (%) for  $\text{C}_{31}\text{H}_{32}\text{O}$  C 88.53, H 7.67; found: C

88.72, H 7.67.

#### Preparation of 1-iodo-4-nonyloxybenzene.

Potassium carbonate (20.00 g  $1.45 \times 10^{-1}$  mol) and 1-bromononane (10.36 g,  $5.00 \times$

$10^{-2}$  mol) were added to 4-iodophenol (10.00 g,  $4.55 \times 10^{-2}$  mol) dissolved in acetone

(150 mL) and the reaction mixture was then heated under reflux (48 hours). The excess

potassium carbonate was then filtered off and solvent was then removed from the filtrate

to give the crude product. The crude product then purified by silica gel chromatography,

eluting with hexane to yield the product as a white solid. Yield 11.1 g,  $3.20 \times 10^{-2}$  mol.

$^1\text{H}$  NMR  $\delta$  7.55 (m, 2H, ArH); 6.67 (m, 2H, ArH); 3.91 [t,  $^3J(\text{H,H}) = 6.4$  Hz, 2H,

$\text{OCH}_2\text{R}$ ]; 1.75 (m 2H,  $-\text{CH}_2\text{-aliphatic}$ ); 1.33 (m, 12H,  $-\text{CH}_2\text{-aliphatic}$ ); 0.89 [t  $^3J(\text{HH}) =$

6.8 Hz 3H,  $-\text{CH}_3$ ].  $^{13}\text{C}$  NMR:  $\delta$  159.4, 138.1, 117.3, 82.7 (Ar); 68.5 ( $\text{OCH}_2\text{-R}$ ), 32.2,

29.9, 29.7, 29.6, 29.5, 26.4, 23.0, (aliphatic) 14.4 ( $-\text{CH}_3$ ). EI-MS 346.0 (68)  $[\text{M}]^+$ , 219.9

$[\text{M-I}]^+$ , 202.9(25.6)  $[\text{M-C}_9\text{H}_{19}\text{O}]^+$ .

# Supplementary Material (ESI) for New Journal of Chemistry  
# This journal is © The Royal Society of Chemistry and  
# The Centre National de la Recherche Scientifique, 2005

**Preparation of 4-nonyloxyphenylacetylene.**

To 1-iodo-nonyloxybenzene (10.30 g,  $2.97 \times 10^{-2}$  mol) in triethylamine (100 mL), Bis(triphenylphosphine)palladium (II) dichloride (0.209 g,  $2.98 \times 10^{-4}$  mol), copper (I) iodide (0.112 g,  $5.88 \times 10^{-4}$  mol) and trimethylsilylacetylene (3.21 g,  $3.27 \times 10^{-2}$  mol) were added and stirred overnight. The solvent was then removed under vacuum, and the crude product was dissolved in methanol (100 mL) to which potassium carbonate (0.124 g,  $9.00 \times 10^{-3}$  mol) was added and stirred 6 hours. The reaction mixture was diluted with water (200 mL) and extracted with diethyl ether ( $2 \times 75$  mL). The crude product was purified by column chromatography on silica gel, eluted with hexane. Yield 4.86g,  $1.99 \times 10^{-2}$  mol, 67%.  $^1\text{H NMR}$   $\delta$  7.44 (m, 2H, ArH); 6.85 (m, 2H, ArH); 3.95 [t,  $^3J(\text{H,H}) = 6.8$  Hz, 2H,  $\text{OCH}_2\text{R}$ ]; 2.99 (s 1H,  $\text{C}\equiv\text{C-H}$ ); 1.78 (m 2H,  $-\text{CH}_2\text{-aliphatic}$ ); 1.45 (m, 2H,  $-\text{CH}_2\text{-aliphatic}$ ); 1.30 (m, 10H,  $-\text{CH}_2\text{-aliphatic}$ ); 0.91 [t  $^3J(\text{HH}) = 6.8$  Hz 3H,  $-\text{CH}_3$ ].  $^{13}\text{C NMR}$ :  $\delta$  159.9, 133.9, 114.8, 114.3 (Ar); 84.1, 75.9 ( $-\text{C}\equiv\text{C}-$ ); 68.4 ( $\text{OCH}_2\text{-R}$ ), 32.5, 29.9, 29.7, 29.6, 29.4, 29.3, 29.2, 26.1, 22.7 (aliphatic); 14.1( $-\text{CH}_3$ ). IR:  $\nu(\text{C}\equiv\text{C-H})$  3318, 3300;  $\nu(\text{C}\equiv\text{C})$  2108  $\text{cm}^{-1}$ . EI-MS 244.1 (61)  $[\text{M}]^+$ , 117.9 (100)  $[\text{M-C}_9\text{H}_{18}]^+$ , 101 (48)  $[\text{M-C}_9\text{H}_{19}\text{O}]^+$ .

# Supplementary Material (ESI) for New Journal of Chemistry  
# This journal is © The Royal Society of Chemistry and  
# The Centre National de la Recherche Scientifique, 2005

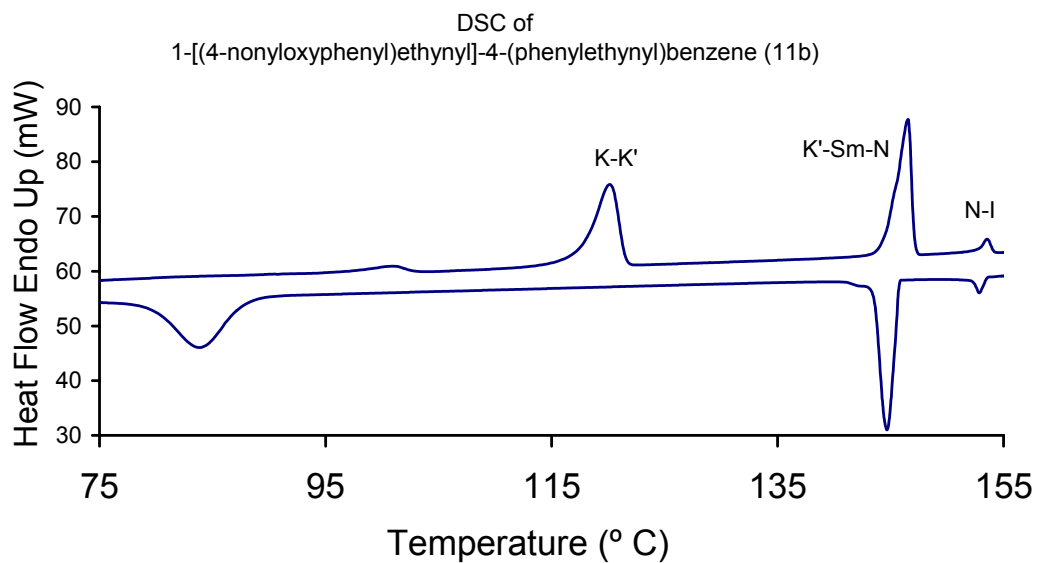

Fig S1. Thermal Analysis of 1-[(4-nonyloxyphenyl)ethynyl]-4-(phenylethynyl)benzene (11b)

- S1. (a) Y.G. Yang, G. Tang, Z. Gong and J.X. Wen, *Mol. Cryst. Liq Cryst.*, 2000, **348**, 153; (b) C. Pugh and V. Percec, *Chem. Mater.*, 1991, **3**, 107; (c) D.W. Bruce, D. Dunmur, E. Lalinde, P.M. Maitlis and P. Styring, *Liq. Cryst.*, 1998, **3**, 385, 395.
